# Supplementary material
Source: publisher site journal article supplement (https://static.cambridge.org/content/id/urn:cambridge.org:id:article:S0899823X19003015/resource/name/S0899823X19003015supp002.docx)
Supplement: Supplementary file 1 [file S0899823X19003015supp002.docx]

**Supplemental Material:**

**Tables:**

| Table 1: Poisson regression for the effect of season on deep surgical site infection rates over time. | |
| --- | --- |
|  | All procedures (n=116 months) |
| Year | 0.91 (0.87, 0.95)** |
| Season |  |
| Summer (ref) | --- |
| Fall | 0.66 (0.43, 1.02) |
| Winter | 0.62 (0.41, 0.95)* |
| Spring | 1.14 (0.78, 1.68) |
| Season Year Interaction |  |
| Summer (ref) | --- |
| Fall | 1.07 (0.99, 1.14) |
| Winter | 1.08 (1.02, 1.16)* |
| Spring | 0.99 (0.93, 1.05) |
| * p-value < 0.05, ** p-value < 0.01 | |

| Table 2: Poisson regression for the effect of month on deep surgical site infection rates. | |
| --- | --- |
|  | All procedures (n=116 months) |
| Month |  |
| July (ref) | --- |
| January | 1.04 (0.76, 1.42) |
| February | 1.25 (0.93, 1.70) |
| March | 1.02 (0.75, 1.40) |
| April | 1.34 (0.99, 1.81) |
| May | 1.27 (0.94, 1.71) |
| June | 1.10 (0.81, 1.49) |
| August | 1.25 (0.92, 1.68) |
| September | 1.07 (0.78, 1.47) |
| October | 0.90 (0.65, 1.25) |
| November | 1.11 (0.81, 1.53) |
| December | 1.06 (0.77, 1.47) |
| Years |  |
| 2009 (ref) | --- |
| 2010 | 0.76 (0.56, 1.03) |
| 2011 | 0.84 (0.63, 1.13) |
| 2012 | 0.59 (0.42, 0.83)** |
| 2013 | 0.55 (0.42, 0.73)** |
| 2014 | 0.64 (0.49, 0.84)** |
| 2015 | 0.48 (0.36, 0.63)** |
| 2016 | 0.82 (0.63, 1.08) |
| 2017 | 0.53 (0.40, 0.69)** |
| 2018 | 0.39 (0.29, 0.54)** |
| * p-value < 0.05, ** p-value < 0.01 | |
